# Supplementary material for: An in situ assembled WO3–TiO2 vertical heterojunction for enhanced Z-scheme photocatalytic activity
Source: Royal Society of Chemistry journal article supplement (doi:10.1039/d0nr01611j), 2020-01-01
Supplement: d0nr01611j1.pdf [file d0nr01611j1.pdf]

## **Supplementary Information**

### **In situ Assembled WO<sub>3</sub>-TiO<sub>2</sub> Vertical Heterojunction for Enhanced Z-scheme Photocatalytic Activity**

Yue Liu, Xiangkang Zeng, Christopher D. Easton, Qinye Li, Yun Xia, Yichun Yin, Xiaoyi Hu, Jian Hu, Dehua Xia, David T. McCarthy, Ana Deletic, Chenghua Sun, Jiaguo Yu and Xiwang Zhang\*

\*Corresponding Author: [xiwang.zhang@monash.edu](mailto:xiwang.zhang@monash.edu)

## Sections

---

### Experimental Section

#### X-ray photoelectron spectroscopy (XPS) characterization

- a) XPS methodology employed in this study
- b) Experimental Details
- c) Quantification
- d) Measured binding energy shifts in high-resolution spectra - Charge correction
- e) Influence of in situ assembly for heterojunction formation and light irradiation on peak positions
- f) Details regarding the fitting of W 4f spectra
- g) Results from fitting W 4f spectra – influence of the in situ assembly and in situ UV irradiation

**Table S1.** XPS spin orbital component positions for selected elements from high-resolution spectra for samples without irradiation.

**Table S2.** XPS spin orbital component positions for selected elements from high-resolution spectra for samples with irradiation.

**Table S3.** Relative fraction of W species in WO<sub>3</sub> and WO<sub>3</sub>-TiO<sub>2</sub> heterojunction samples derived from component fitting of high-resolution W 4f XPS spectra.

**Fig. S1** Selected, representative high-resolution O 1s spectra from TiO<sub>2</sub>, WO<sub>3</sub> and WO<sub>3</sub>-TiO<sub>2</sub> heterojunction samples

**Fig. S2** Selected, representative high-resolution Ti 3p spectrum from the TiO<sub>2</sub> reference sample

**Fig. S3** Fitting of selected, representative W 4f spectra of the WO<sub>3</sub>-TiO<sub>2</sub> heterojunction with irradiation using a model spectrum.

#### Characterization of the WO<sub>3</sub>-TiO<sub>2</sub> heterojunction

**Fig. S4** TEM image of TiO<sub>2</sub> nanosheets synthesized by the growth control method.

**Fig. S5** (a-c) TEM, HRTEM and (d-f) EDX mapping images of the lateral surface of the WO<sub>3</sub>-TiO<sub>2</sub> vertical heterojunction

**Table S4.** Zeta potential of the as-prepared TiO<sub>2</sub> nanosheets at pH = 2

**Fig. S6** Formation of H<sub>2</sub>WO<sub>4</sub> and WO<sub>3</sub> nanosheets over TiO<sub>2</sub>.

**Fig. S7** SEM image of WO<sub>3</sub> fabricated in the absence of TiO<sub>2</sub> nanosheets

**Fig. S8** SEM images of samples obtained after 1 h-hydrolysis reaction and that was further processed in hydrothermal reaction at 180 °C for 4 h

**Fig. S9** XRD patterns and SEM images of H<sub>2</sub>WO<sub>4</sub>-TiO<sub>2</sub> samples obtained through hydrothermal treatment at 120 °C.

**Fig. S10** XRD patterns and SEM images of H<sub>2</sub>WO<sub>4</sub> (or WO<sub>3</sub>)-TiO<sub>2</sub> samples obtained through hydrothermal treatment at 150 °C.

**Fig. S11** XRD patterns of H<sub>2</sub>WO<sub>4</sub> (or WO<sub>3</sub>)-TiO<sub>2</sub> samples obtained through hydrothermal treatment at 180 °C.

**Fig. S12** SEM images of H<sub>2</sub>WO<sub>4</sub> (or WO<sub>3</sub>)-TiO<sub>2</sub> samples obtained through hydrothermal treatment at 180 °C.

**Fig. S13** The thickness and lateral sizes of WO<sub>3</sub> (or H<sub>2</sub>WO<sub>4</sub>) nanosheets synthesized at 180 °C.

**Fig. S14** XRD patterns of WO<sub>3</sub>-TiO<sub>2</sub> samples hydrothermally synthesized at 210 °C. Thickness of H<sub>2</sub>WO<sub>4</sub> and WO<sub>3</sub> nanosheets that were in situ grafted on TiO<sub>2</sub> sheets. SEM images of WO<sub>3</sub>-TiO<sub>2</sub> heterojunction prepared via hydrothermal treatment at 210 °C.

**Fig. S15** Raman and FTIR spectra of pure WO<sub>3</sub>, TiO<sub>2</sub> and the WO<sub>3</sub>-TiO<sub>2</sub> vertical heterojunction.

**Fig. S16** Selected, representative XPS survey spectrum of the WO<sub>3</sub>-TiO<sub>2</sub> heterojunction

**Table S5** Elemental quantification derived from XPS survey spectra of the WO<sub>3</sub>-TiO<sub>2</sub> heterojunction.

**Fig. S17** High-resolution XPS fitting spectra of W 4f for WO<sub>3</sub> and the WO<sub>3</sub>-TiO<sub>2</sub> heterojunction.

## **Z-scheme photocatalytic charge transportation route**

**Fig. S18** EPR spectra of •OH and •O<sub>2</sub><sup>-</sup> generated by TiO<sub>2</sub>, WO<sub>3</sub> and the WO<sub>3</sub>-TiO<sub>2</sub> heterojunction in dark and under Xenon lamp irradiation.

**Fig. S19** The amount of  $\text{H}_2\text{O}_2$  in the  $\text{WO}_3$ - $\text{TiO}_2$  photocatalytic system with isopropanol as  $\cdot\text{OH}$  scavenger and  $\text{N}_2$  purging to remove  $\text{O}_2$

**Fig. S20** (a) UV–vis diffuse reflectance spectra and (b) plots of the  $(\alpha h\nu)^{1/2}$  versus photon energy of the photocatalysts

**Fig. S21** Mott-Schottky plots of (a)  $\text{TiO}_2$  and (b)  $\text{WO}_3$

**Table S6** Bandgaps and band edge potentials of  $\text{TiO}_2$  and  $\text{WO}_3$

### **Photocatalytic antibacterial performance**

**Fig. S22** *E. coli* survival rate with the existence of scavenger of individual ROS.

### **References**

## 1 **Experimental Section**

### 2 **X-ray photoelectron spectroscopy (XPS) characterization**

#### 3 *a) XPS methodology employed in this study*

4 Below is a detailed description of the steps involved in the acquisition, processing and  
5 interpretation of the XPS data collected for this study. This is provided so that the reader has  
6 sufficient information to replicate this study and can judge the validity of the results presented.  
7 The reasoning for providing a detailed account is threefold:

8 1) It is in direct response to what has been coined the “reproducibility crisis”, where there  
9 is great concern regarding reproducibility and replication issues in science in general, but more  
10 specifically the impact in vacuum sciences,<sup>1</sup> which includes XPS. As detailed by Baer and  
11 Gilmore,<sup>1</sup> there is a coordinated effort by those in the field to address this problem; this section  
12 has been written for this purpose.

13 2) Use of XPS in the characterisation of materials for catalysis has been common for many  
14 years. However, after a limited review of the literature of the field, it is apparent that  
15 insufficient detail is provided for XPS experimentation and interpretation. For example, studies  
16 that have reported observing charge transfer in photocatalysts with XPS don’t tend to provide  
17 any detail on their methodology for charge correction. Thus, we hope to provide readers with  
18 sufficient information such that they can reproduce our experimentation and to encourage best  
19 practice.

20 3) The conclusions derived in this work rely heavily on the XPS data and interpretation.

#### 21 *b) Experimental Details*

22 XPS analysis was performed using AXIS Nova and AXIS Ultra-DLD spectrometers (Kratos  
23 Analytical Inc., Manchester, UK) with a monochromated Al K $\alpha$  source at a power of 180 W

1 (15 kV 12 mA) and a hemispherical analyser operating in the fixed analyser transmission mode.  
2 The total pressure in the main vacuum chamber during analysis was typically between  $10^{-9}$  and  
3  $10^{-8}$  mbar. Survey spectra were acquired at a pass energy of 160 eV. To obtain more detailed  
4 information about chemical structure, oxidation states etc., high-resolution spectra were  
5 recorded from individual peaks at 20 eV (yielding a typical peak width for polymers of  $< 1.0$   
6 eV).

7 Every specimen was analysed at an emission angle of  $0^\circ$  as measured from the surface  
8 normal. Assuming typical values for the electron attenuation length of relevant photoelectrons  
9 the XPS analysis depth (from which 95 % of the detected signal originates) ranges between 5  
10 and 10 nm for a flat surface.

11 In situ UV irradiation of the sample, where the sample is irradiated during XPS analysis,  
12 was performed using a helium discharge source optimised for He I radiation (21.22 eV),  
13 normally employed for Ultraviolet Photoelectron Spectroscopy (UPS). To confirm operation  
14 of the lamp and alignment of illumination with the sample surface, a UPS spectrum was  
15 collected from an Ag foil sample etched with a Gas Cluster Ion Source (Minibeam 6) for at  
16 least 60s. During in situ irradiation of the  $\text{WO}_3$ ,  $\text{TiO}_2$  and  $\text{WO}_3\text{-TiO}_2$  heterojunction samples,  
17 only high-resolution spectra were collected. Data collection near the Fermi edge using the  
18 parameters employed herein was prevented to avoid saturating the detector with UV-  
19 photoelectrons and thus ensure the integrity of the analyser.

## 20 *c) Quantification*

21 Data processing was performed using CasaXPS processing software version 2.3.15 (Casa  
22 Software Ltd., Teignmouth, UK). All elements present were identified from survey spectra.  
23 The atomic concentrations of the detected elements were calculated using integral peak  
24 intensities and the sensitivity factors supplied by the manufacturer.

25 The accuracy associated with quantitative XPS is *ca.* 10% - 15%.

1 Precision (*i.e.* reproducibility) depends on the signal/noise ratio but is usually much better  
2 than 5%. The latter is relevant when comparing similar samples.

### 3 *d) Measured binding energy shifts in high-resolution spectra - Charge correction*

4 When comparing peak positions of high-resolution XPS spectra, a reliable and consistent  
5 charge correction methodology is necessary. It is important to detail the methodology used for  
6 charge correction when presenting such comparisons, particularly when an author relies  
7 heavily on minor changes in binding energy (BE), so that the reader can make a judgement call  
8 regarding the validity of the statements made based on these shifts. In this work, we used BE  
9 positions to compare the position of peaks of the reference WO<sub>3</sub> and TiO<sub>2</sub>, and the WO<sub>3</sub>-TiO<sub>2</sub>  
10 heterojunction; we also compare the peak positions of the samples without and during in situ  
11 irradiation. The error associated with charge correction is approximately  $\pm 0.2$  eV;<sup>2</sup> as a result,  
12 minor shifts in BE between spectra that are sometimes relied upon in the literature can be  
13 insignificant and thus readers should take care when interpreting and relying upon such results.

14  
15 Several attempts were made to find the most appropriate peak and BE for charge correction  
16 of these samples. It was decided to reference BEs to the C 1s peak at 285 eV, which would be  
17 consistent with aliphatic hydrocarbon. It is acknowledged that the C 1s is not the most  
18 appropriate peak for charge reference for inorganic samples, where it is usually associated with  
19 adventitious carbon and in low concentration. A discussion of the merits of using adventitious  
20 carbon as a charge reference can be found elsewhere.<sup>2,3</sup> Nevertheless, it became apparent while  
21 processing the data that there was no other peak available for charge correction, as it was  
22 observed that the peak position of some peaks in the heterojunction shifted relative to the  
23 reference materials. Such a result would be consistent with charge sharing between different  
24 components of the nanocomposite.

Peak positions for the samples without and during in situ irradiation are provided below in **Table S1** and **Table S2**. In the case of the WO<sub>3</sub> and TiO<sub>2</sub> reference materials, the peak positions are consistent with reference data found in the NIST database<sup>4</sup> and other published results.<sup>5, 6</sup> Thus, charge correction of the spectra to the C 1s peak at 285 eV was considered satisfactory in this case.

*e) Influence of in situ assembly for heterojunction formation and light irradiation on peak positions*

For the WO<sub>3</sub>-TiO<sub>2</sub> heterojunction, the O 1s peak position is consistent with the measured value for the reference WO<sub>3</sub> sample rather than the reference TiO<sub>2</sub> sample (**Fig. S1**). No evidence of differential charging was observed (*i.e.* shifting of part of the peak intensity to higher BEs) in the O 1s spectra, or any other spectra examined herein. In all cases, the majority of intensity for O 1s was assigned to oxygen associated with oxide at  $529.7 \pm 0.1$  for TiO<sub>2</sub> or  $530.6 \pm 0.1$  for WO<sub>3</sub> and the heterojunction.

In regards to the W 4f<sub>7/2</sub> peak, a difference of 0.06 eV was observed in the BE position when comparing the WO<sub>3</sub> reference and WO<sub>3</sub>-TiO<sub>2</sub>, with a shift to lower BE for WO<sub>3</sub>-TiO<sub>2</sub>. Based on the discussion above, the magnitude of the shift is not considered significant, though a shift to lower BE would be consistent with W accepting electrons.

The only significant shift observed is that of the Ti 2p<sub>3/2</sub> peak. For the WO<sub>3</sub>-TiO<sub>2</sub>, a BE of  $459.4 \pm 0.1$  eV was measured, equating to a shift of +0.9 eV relative to the TiO<sub>2</sub> reference sample. A positive shift in peak position is consistent with Ti donating electrons. Thus the shifts in the WO<sub>3</sub>-TiO<sub>2</sub> peak positions relative to the starting materials suggest that the TiO<sub>2</sub> in the heterojunction is donating electrons to WO<sub>3</sub>.

For all elements and species examined here, no significant shift was observed in binding energy when the samples were irradiated with the He lamp discharge. The largest shift recorded was less than 0.1 eV as shown in **Table S2**.

## 1 *f) Details regarding the fitting of W 4f spectra*

2 Fitting of high-resolution XPS spectra, in particular mixed metal and metal oxide spectra, is  
3 not trivial. Thorough knowledge of the core principles underpinning the photoemission  
4 process, in addition to an understanding of the instrumentation and experimental procedure are  
5 necessary to first design the appropriate experiment, then process and interpret the resultant  
6 data correctly. In the best case scenario, researchers should rely on independent subject matter  
7 experts to assist with processing and interpreting XPS spectra. Collaboration with facilities  
8 with such expertise is strongly encouraged. If such expertise is not available, then researchers  
9 should rely on resources such as credible books,<sup>7, 8</sup> online resources<sup>9, 10</sup> and specialist journals  
10 such as Surface Science Spectra to build expertise. It is not recommended that researches rely  
11 solely on research articles in their specialised field. This section is aimed at a reader with  
12 experience in peak fitting of XPS spectra using a software package such as CasaXPS and an  
13 understanding of the core principals behind XPS.

14 Recently, Peter M.A. Sherwood published an excellent review article that explores  
15 fundamental aspects and many of the complications involved in fitting of XPS spectra.<sup>6</sup>  
16 Sherwood provides a detailed overview of the history of fitting functions employed in the field,  
17 where the author states “The Voigt function is preferred to the pseudo Voigt functions as it is  
18 the most physically meaningful function”.<sup>6</sup> Within CasaXPS, pseudo-Voigt functions are  
19 represented by GL and SGL line-shapes which are commonly used in the literature but not  
20 recommended, while the LA and LF line-shapes represent a generalised Voigt line-shape.<sup>11</sup>  
21 Herein, the following LF line-shapes were employed for the specified spin orbital components:  
22 O 1s - LF(0.8,1.2,30,400); W 5p - LF(1,1.5,10,200); W 4f - LF(1,1.8,100,200).

23 In addition to line-shapes, another important but often overlooked parameter of a fit is the  
24 choice of background. Details of various background types can be found elsewhere.<sup>6, 11</sup> It is of  
25 this author’s opinion that choice of background is a contentious issue in the field and there is

1 no clear “one size fits all” approach to selection, nor is there a consensus regarding the best  
2 approach. Herein, a three-parameter Tougaard background was employed for all peak fitting,<sup>12</sup>  
3 application of this background as “U 3 Tougaard” within CasaXPS can be found elsewhere.<sup>13</sup>

4 To account for spin orbital splitting of the W 4f peak, two components were employed to  
5 represent W 4f<sub>7/2</sub> and W 4f<sub>5/2</sub>, where each doublet is assigned to a specific W species. A fixed  
6 area ratio of 4:3 was employed for each doublet. Initially, a fixed doublet separation was  
7 employed. However, an improved figure of merit was obtained when then the position of the  
8 W 4f<sub>5/2</sub> peak was allowed some freedom of movement via a small window in the position  
9 constraint for the fit. In both the WO<sub>3</sub> reference and WO<sub>3</sub>-TiO<sub>2</sub> heterojunction, a shoulder was  
10 observed at the lower BE side of the W 4f spectra, for example, **Fig. S17** and **Fig. 4f-g** When  
11 fitting the W 4f spectra, the majority of the intensity was assigned to W<sup>6+</sup>, while the shoulder  
12 was assigned to W<sup>5+</sup>. A peak was observed at higher BE associated with W 5p and was  
13 represented by a single component. In the case of WO<sub>3</sub>-TiO<sub>2</sub>, an additional component was  
14 required to account for the intensity associated with the Ti 3p peak that overlaps with the W 4f  
15 peak. For this component, a Ti 3p spectrum collected from the TiO<sub>2</sub> reference sample as shown  
16 in **Fig. S2** was used as a model component. Fitting spectra using model components has been  
17 utilized previously in the literature.<sup>14</sup>

#### 18 *g) Results from fitting W 4f spectra – influence of the in situ assembly and in situ UV* 19 *irradiation*

20 Results from fitting of the W 4f spectra are presented in **Table S3**, where representative  
21 spectra can be found in **Fig. S17** and **Fig. 4f-g**. The influence of in situ coupling on the W 4f  
22 spectra was observed in the concentration of the component doublet assigned to W<sup>5+</sup> with a  
23 measured change in %Area of 144.7%. The heterojunction had the largest measured relative  
24 fraction of W<sup>5+</sup>, without and with irradiation. The measured changes in peak position detailed  
25 above, while not significant, were consistent with W accepting electrons, whereby an increase

1 in  $W^{5+}$  provides additional evidence for this hypothesis. For both  $WO_3$  and the  $WO_3$ - $TiO_2$   
2 heterojunction, an increase in the relative fraction of  $W^{5+}$  was observed with irradiation. The  
3 change in %Area of the component doublet was 43.0% for  $WO_3$  and 23.0% for  $WO_3$ - $TiO_2$ .  
4 An alternative fitting protocol was employed for the W 4f spectrum of the heterojunction  
5 with irradiation, presented in **Fig. S3**. A spectrum of the  $WO_3$ - $TiO_2$  heterojunction without  
6 irradiation was used as a fitting component, where the full width at half maximum was fixed  
7 to a very narrow window (i.e.  $1.0 \pm 0.01$ ) to accurately reflect the spectral envelope of a  
8 nanocomposite spectrum. The remainder of the intensity for the spectrum was accounted by a  
9 single doublet “W2”, which was assigned to  $W^{5+}$  in all the fits presented herein. This fit  
10 demonstrates that with in situ UV light irradiation, the change in the W 4f spectrum is  
11 associated with a change in the relative fraction of the two main species  $W^{6+}$  and  $W^{5+}$ . It also  
12 confirms the result of the original fitting protocol that there is an increase in intensity associated  
13 of  $W^{5+}$  with irradiation. As the change in the peak shape of the W 4f spectrum is accounted  
14 solely by the  $W^{5+}$  component doublet with the fitting parameter restrictions detailed above, it  
15 is unlikely that the relative change in  $W^{5+}$  intensity is associated with an instrumental artefact,  
16 such as differential charging.

**Table S1.** XPS spin orbital component positions for selected elements from high-resolution spectra for **samples without irradiation**. Listed are the mean  $\pm$  deviation from two analysis points per sample, with two (TiO<sub>2</sub> and WO<sub>3</sub> samples) or four (WO<sub>3</sub>-TiO<sub>2</sub>) samples per sample type.

| Sample                                              | Measured binding energy values (eV) |                            |                            |                            |                            |                    |                    |
|-----------------------------------------------------|-------------------------------------|----------------------------|----------------------------|----------------------------|----------------------------|--------------------|--------------------|
|                                                     | W 5p                                | W 4f <sub>7/2</sub>        |                            | W 4f <sub>5/2</sub>        |                            | O 1s               |                    |
|                                                     |                                     | W <sup>(6+)</sup> –<br>W1a | W <sup>(5+)</sup> –<br>W2a | W <sup>(6+)</sup> –<br>W1b | W <sup>(5+)</sup> –<br>W2b |                    |                    |
| TiO <sub>2</sub>                                    | -                                   | -                          | -                          | -                          | -                          | 529.7<br>$\pm$ 0.1 | 458.5<br>$\pm$ 0.0 |
| WO <sub>3</sub>                                     | 41.42<br>$\pm$ 0.10                 | 35.79<br>$\pm$ 0.07        | 34.67<br>$\pm$ 0.08        | 37.94<br>$\pm$ 0.07        | 36.80<br>$\pm$ 0.08        | 530.6<br>$\pm$ 0.1 | -                  |
| WO <sub>3</sub> -TiO <sub>2</sub><br>heterojunction | 41.36<br>$\pm$ 0.05                 | 35.73<br>$\pm$ 0.04        | 34.67<br>$\pm$ 0.04        | 37.86<br>$\pm$ 0.04        | 36.70<br>$\pm$ 0.00        | 530.6<br>$\pm$ 0.1 | 459.4<br>$\pm$ 0.1 |

**Table S2.** XPS spin orbital component positions for selected elements from high-resolution spectra for **samples with irradiation**. Listed are the mean  $\pm$  deviation from one analysis point per sample, with two (TiO<sub>2</sub> and WO<sub>3</sub> samples) or four (WO<sub>3</sub>-TiO<sub>2</sub>) samples per sample type.

| Sample                                                   | Measured binding energy values (eV) |                            |                            |                            |                            |                    |                    |
|----------------------------------------------------------|-------------------------------------|----------------------------|----------------------------|----------------------------|----------------------------|--------------------|--------------------|
|                                                          | W 5p                                | W 4f <sub>7/2</sub>        |                            | W 4f <sub>5/2</sub>        |                            | O 1s               |                    |
|                                                          |                                     | W <sup>(6+)</sup> –<br>W1a | W <sup>(5+)</sup> –<br>W2a | W <sup>(6+)</sup> –<br>W1b | W <sup>(5+)</sup> –<br>W2b |                    |                    |
| <b>TiO<sub>2</sub></b>                                   | -                                   | -                          | -                          | -                          | -                          | 529.7<br>$\pm$ 0.1 | 458.5<br>$\pm$ 0.0 |
| <b>WO<sub>3</sub></b>                                    | 41.39<br>$\pm$ 0.12                 | 35.78<br>$\pm$ 0.09        | 34.68<br>$\pm$ 0.09        | 37.94<br>$\pm$ 0.09        | 36.81<br>$\pm$ 0.09        | 530.6<br>$\pm$ 0.1 | -                  |
| <b>WO<sub>3</sub>-TiO<sub>2</sub><br/>heterojunction</b> | 41.37<br>$\pm$ 0.06                 | 35.75<br>$\pm$ 0.06        | 34.70<br>$\pm$ 0.06        | 37.87<br>$\pm$ 0.06        | 36.71<br>$\pm$ 0.02        | 530.6<br>$\pm$ 0.1 | 459.4<br>$\pm$ 0.1 |

**Table S3.** Relative fraction of W species in WO<sub>3</sub> and WO<sub>3</sub>-TiO<sub>2</sub> heterojunction samples derived from component fitting of high-resolution W 4f XPS spectra. Listed are the mean  $\pm$  deviation from one (with irradiation) or two (without irradiation) analysis points per sample, with two (TiO<sub>2</sub> and WO<sub>3</sub> samples) or four (WO<sub>3</sub>-TiO<sub>2</sub>) samples per sample type.

| Sample                                                   | %Area for W <sup>6+</sup><br>contribution | %Area for W <sup>5+</sup><br>contribution | Change in %Area<br>induced by<br>assembly for W <sup>5+</sup><br>(%) | Change in %Area<br>induced by<br>irradiation for<br>W <sup>5+</sup> (%) |
|----------------------------------------------------------|-------------------------------------------|-------------------------------------------|----------------------------------------------------------------------|-------------------------------------------------------------------------|
| WO <sub>3</sub><br>without irradiation                   | 93.1 $\pm$ 0.7                            | 3.1 $\pm$ 0.9                             | -                                                                    | -                                                                       |
| WO <sub>3</sub><br>with irradiation                      | 91.7 $\pm$ 1.1                            | 4.4 $\pm$ 1.3                             | -                                                                    | <b>43.0</b>                                                             |
| WO <sub>3</sub> -TiO <sub>2</sub><br>without irradiation | 73.3 $\pm$ 1.6                            | 7.6 $\pm$ 0.8                             | <b>144.7</b>                                                         | -                                                                       |
| WO <sub>3</sub> -TiO <sub>2</sub><br>with irradiation    | 70.3 $\pm$ 1.5                            | 9.3 $\pm$ 0.8                             | -                                                                    | <b>23.0</b>                                                             |

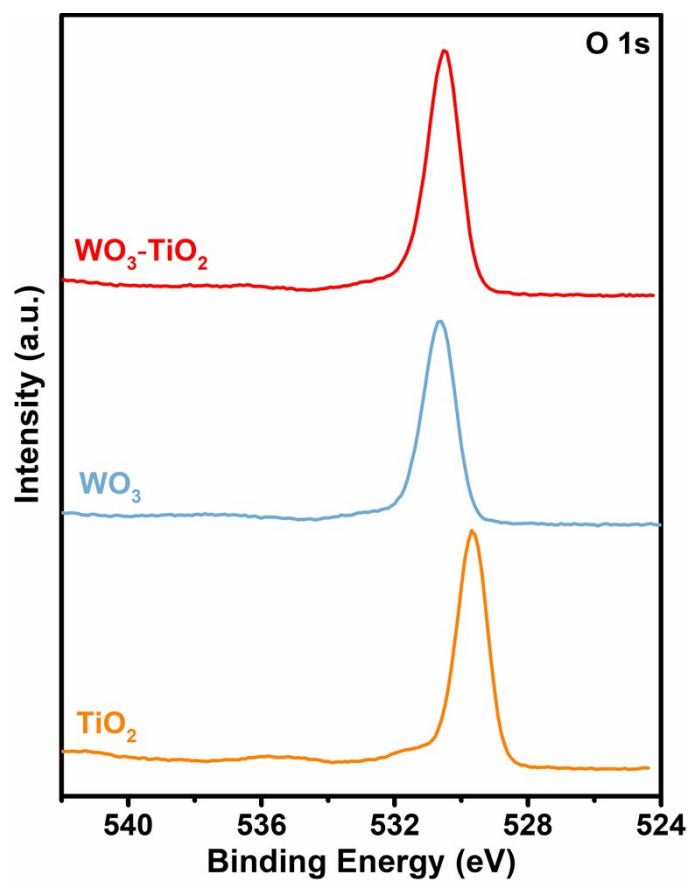

**Fig. S1** Selected, representative high-resolution O 1s spectra from  $\text{TiO}_2$ ,  $\text{WO}_3$  and  $\text{WO}_3\text{-TiO}_2$  heterojunction samples.

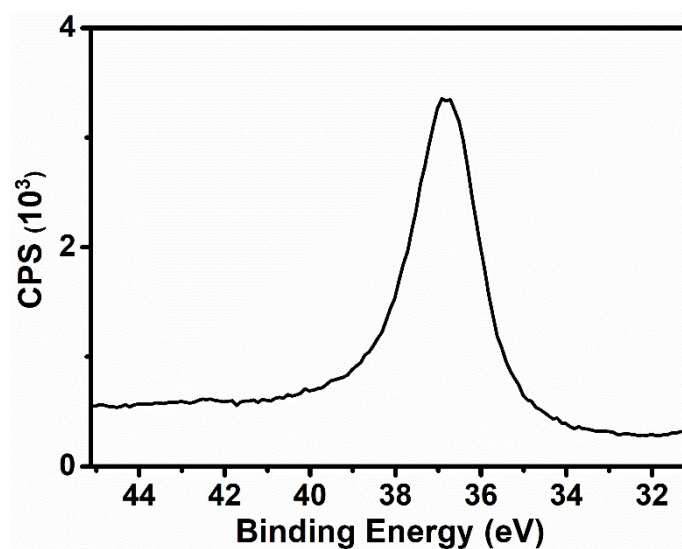

**Fig. S2** Selected, representative high-resolution Ti 3p spectrum from the TiO<sub>2</sub> reference sample.

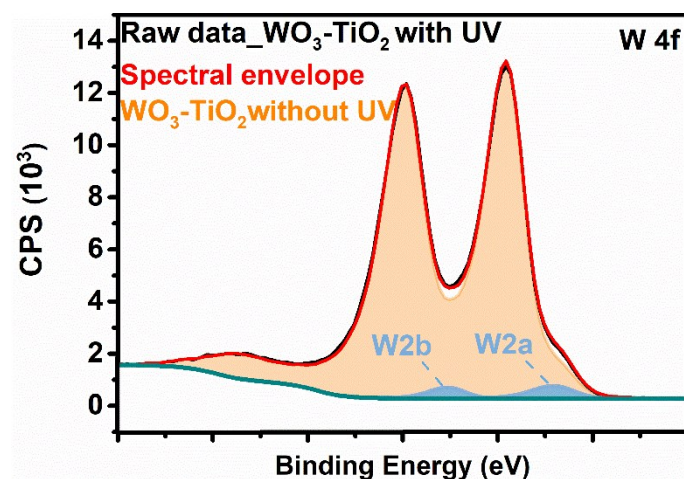

**Fig. S3** Fitting of selected, representative W 4f spectra of the WO<sub>3</sub>-TiO<sub>2</sub> heterojunction with irradiation using a model spectrum, specifically the experimental data of the same sample without irradiation. The remaining doublet W2 peaks is assigned to W<sup>5+</sup>.

## Characterization of the $\text{WO}_3\text{-TiO}_2$ heterojunction.

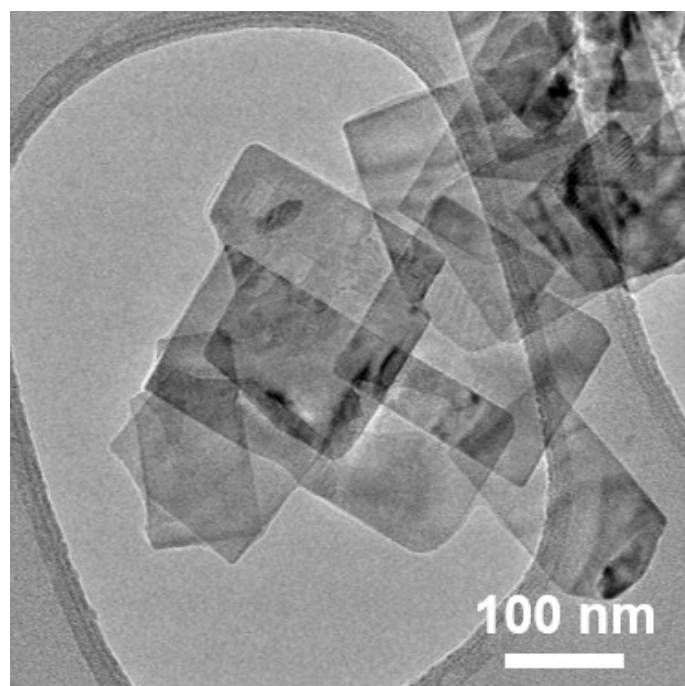

**Fig. S4** TEM image of  $\text{TiO}_2$  nanosheets synthesized by the growth control method.

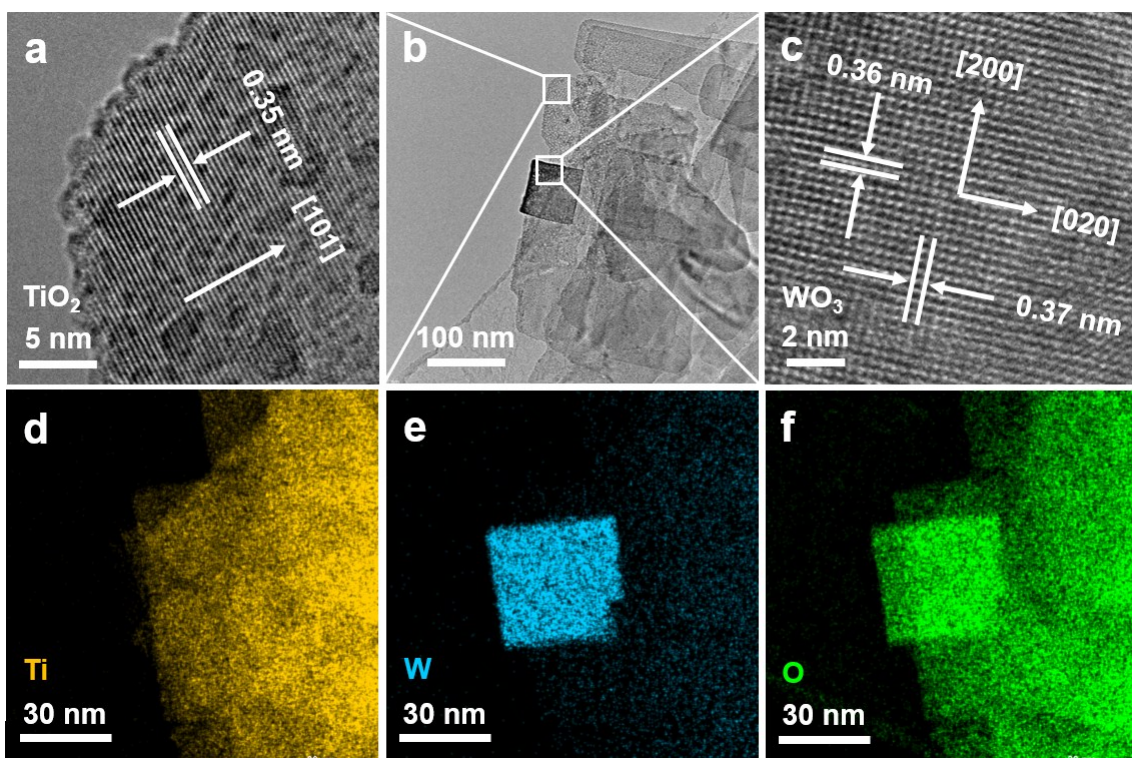

**Fig. S5** (a-c) TEM, HRTEM and (d-f) EDX mapping images of the lateral surface of the  $\text{WO}_3$ - $\text{TiO}_2$  vertical heterojunction.

In **Fig. S5a**, the lattice recorded from the lateral surface of a  $\text{TiO}_2$  nanosheet shows an interplanar distance of 0.35 nm which corresponds to  $\{101\}$  faces of anatase phase<sup>15</sup>. In **Fig. S5c**, the lattice distances of 0.36 and 0.37 nm of  $\text{WO}_3$  could be assigned to the monoclinic- $\{200\}$  and  $\{020\}$  planes respectively.<sup>16</sup>

**Table S4.** Zeta potential of the as-prepared TiO<sub>2</sub> nanosheets at pH = 2.

| Time of repetition  | 1      | 2      | 3      | Average              |
|---------------------|--------|--------|--------|----------------------|
| Zeta-potential (mV) | + 21.6 | + 22.6 | + 21.5 | + 21.9 ( $\pm$ 0.61) |

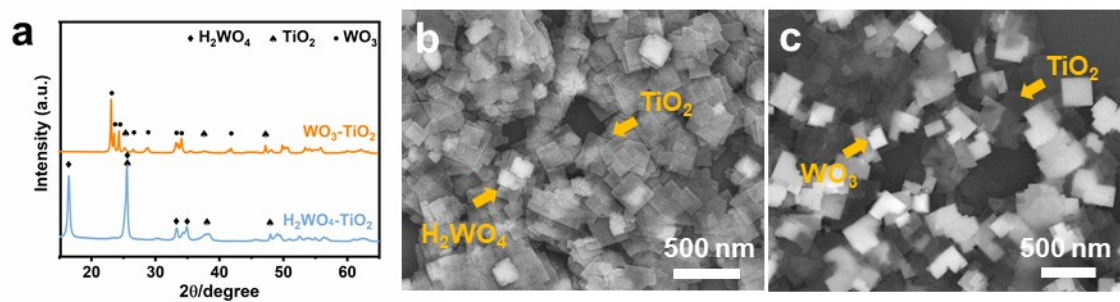

**Fig. S6** Formation of H<sub>2</sub>WO<sub>4</sub> and WO<sub>3</sub> nanosheets over TiO<sub>2</sub>: (a) XRD spectra of the H<sub>2</sub>WO<sub>4</sub>-TiO<sub>2</sub> obtained after 14 h-hydrolysis (pH = 2) and WO<sub>3</sub>-TiO<sub>2</sub> samples obtained from the following hydrothermal treatment at 180 °C for 4 h. SEM images of the (b) H<sub>2</sub>WO<sub>4</sub>-TiO<sub>2</sub> and (c) WO<sub>3</sub>-TiO<sub>2</sub> samples presented in (a).

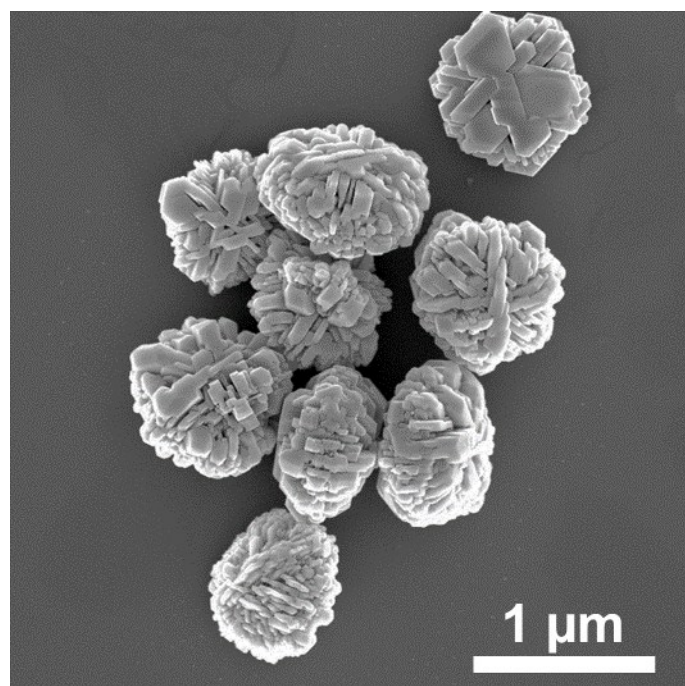

**Fig. S7** SEM image of WO<sub>3</sub> fabricated in the absence of TiO<sub>2</sub> nanosheets.

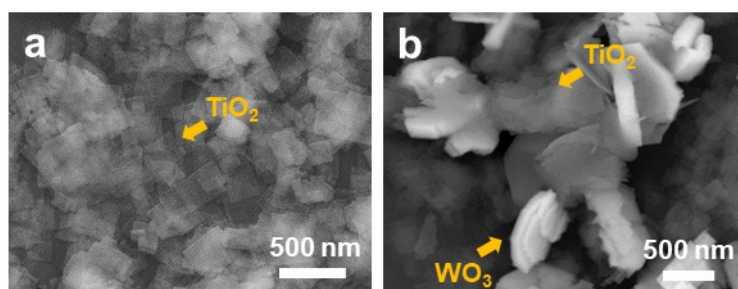

**Fig. S8** SEM images of samples (a) obtained after 1 h-hydrolysis reaction and (b) that was further processed in hydrothermal reaction at 180 °C for 4 h.

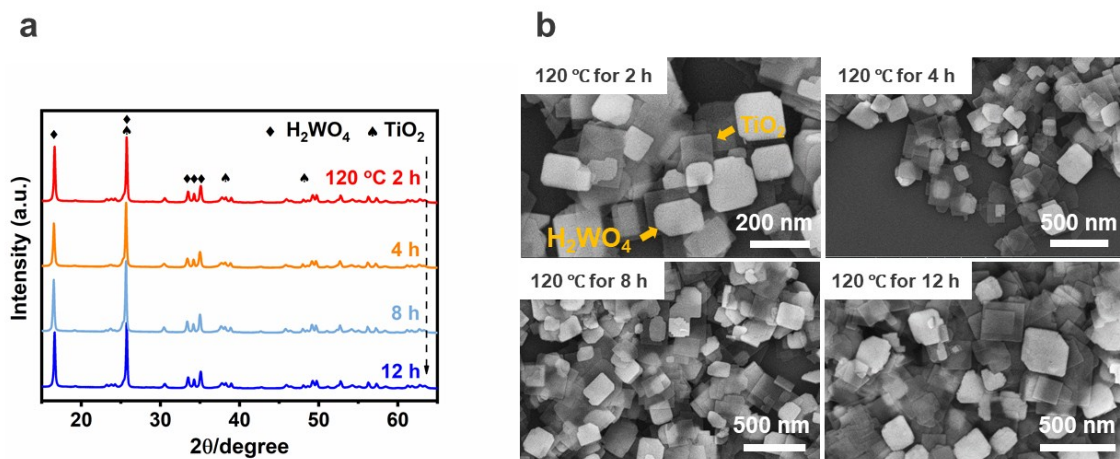

**Fig. S9** (a) XRD patterns and (b) SEM images of  $\text{H}_2\text{WO}_4$ - $\text{TiO}_2$  samples obtained through hydrothermal treatment at 120 °C for different time.

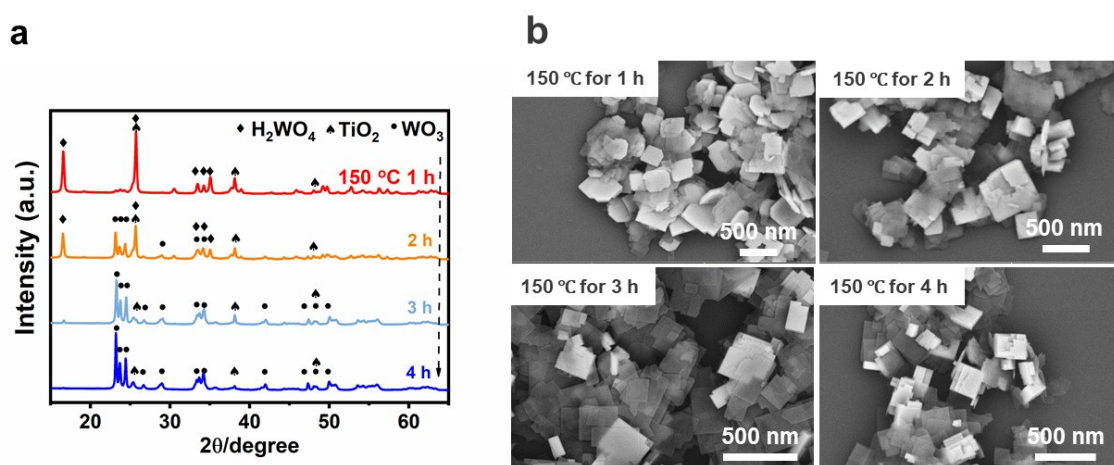

**Fig. S10** (a) XRD patterns and (b) SEM images of  $\text{H}_2\text{WO}_4$  (or  $\text{WO}_3$ )- $\text{TiO}_2$  samples obtained through hydrothermal treatment at 150 °C for different time.

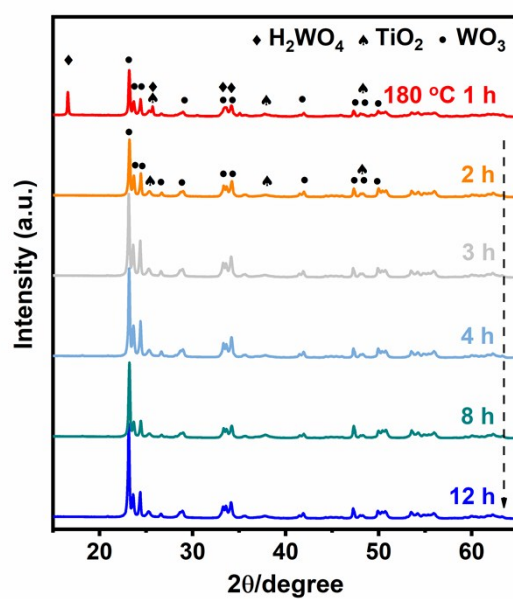

**Fig. S11** XRD patterns of  $\text{H}_2\text{WO}_4$  (or  $\text{WO}_3$ )- $\text{TiO}_2$  samples obtained through hydrothermal treatment at 180 °C for different time.

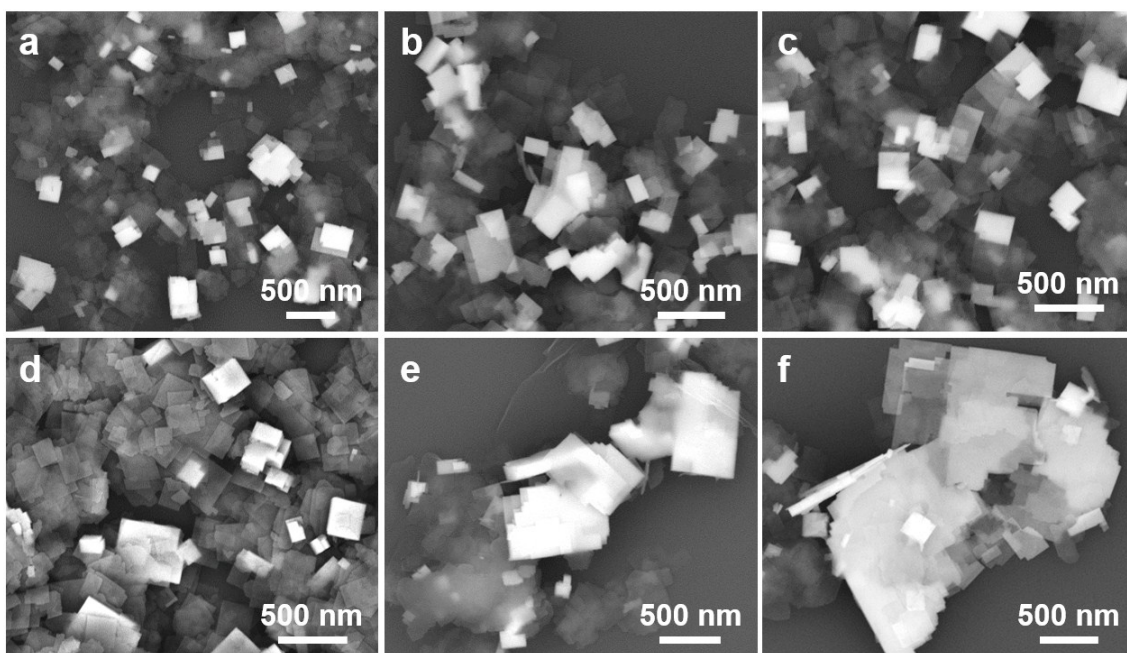

**Fig. S12** SEM images of  $\text{H}_2\text{WO}_4$  (or  $\text{WO}_3$ )- $\text{TiO}_2$  samples obtained through hydrothermal treatment at 180 °C for (a) 1 h, (b) 2 h, (c) 3 h, (d) 4 h, (e) 8 h and (f) 12 h.

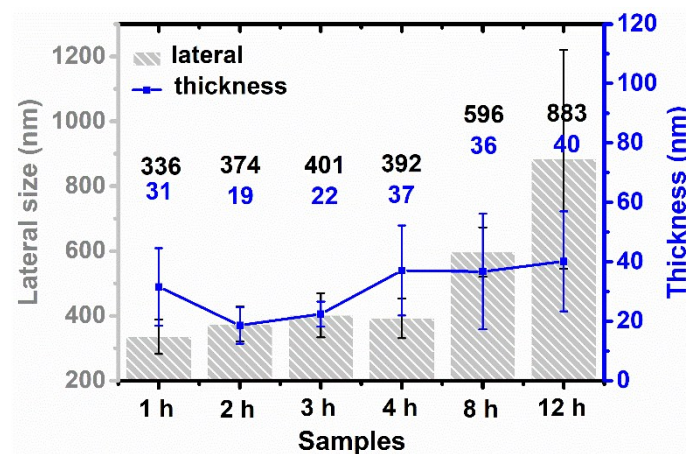

**Fig. S13** The thickness and lateral sizes of  $\text{WO}_3$  (or  $\text{H}_2\text{WO}_4$ ) nanosheets synthesized at 180 °C for different treatment time. Error bar represents standard deviation from 20 analysis points.

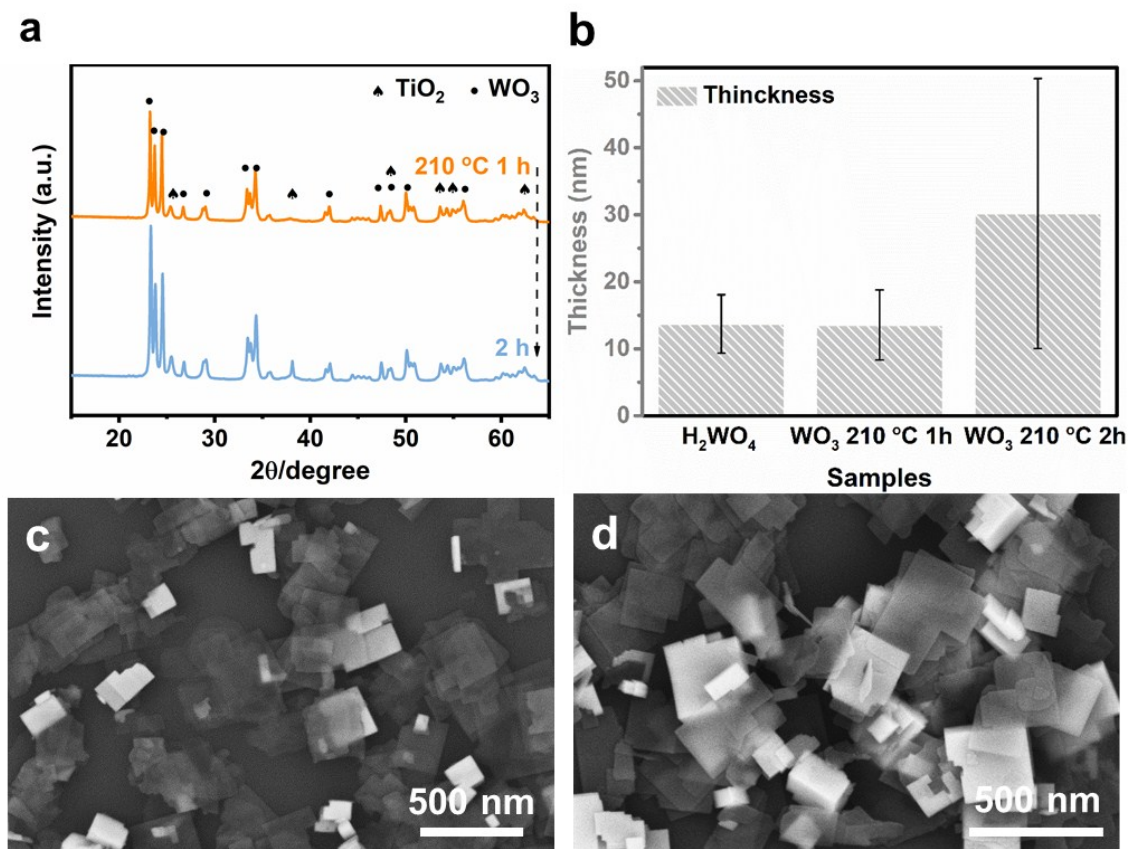

**Fig. S14** (a) XRD patterns of WO<sub>3</sub>-TiO<sub>2</sub> samples hydrothermally synthesized at 210 °C; (b) Thickness of H<sub>2</sub>WO<sub>4</sub> and WO<sub>3</sub> nanosheets that were in situ grafted on TiO<sub>2</sub> sheets. The WO<sub>3</sub> nanosheets were prepared through a further hydrothermal treatment at 210 °C compared with the H<sub>2</sub>WO<sub>4</sub> sheets. Error bar represent standard deviation from 20 analysis points; SEM images of WO<sub>3</sub>-TiO<sub>2</sub> heterojunction prepared via hydrothermal treatment at 210 °C for (c) 1 h and (d) 2 h.

Temperature and time of hydrothermal treatment have significant impacts on the morphology and crystallinity of the final  $\text{WO}_3\text{-TiO}_2$  samples. As shown in **Fig. S9**,  $\text{H}_2\text{WO}_4$  was still the dominant phase of tungsten for the samples prepared under 120 °C even though the treatment time was extended to 12 h. It demonstrates that 120 °C is not sufficient to drive the dehydration of  $\text{H}_2\text{WO}_4$  forming  $\text{WO}_3$ . When the temperature was increased to 150 °C, the shrinking of the  $\text{H}_2\text{WO}_4$  diffraction intensity implied gradual decomposition of  $\text{H}_2\text{WO}_4$  to  $\text{WO}_3$  with increasing time (**Fig. S10a**). Almost all tungsten phase has transformed into  $\text{WO}_3$  at the third hour. There was an obvious morphology variation, from regular, single-layer plate to thick and step-like structure (**Fig. S10b**), demonstrating that phase conversion was accompanied by crystal growth. The phase conversion was faster at 180 °C. As shown in **Fig. S11**, the  $\text{H}_2\text{WO}_4$  peaks disappear after 2 h-hydrothermal treatment, suggesting the completion of dehydration. Besides, there was a gradual coarsening of the  $\text{WO}_3$  sheets in thickness and lateral size, although the phase transformation has terminated when the treatment time was extended from 2 h to 12 h (**Fig. S12 and S13**). When the hydrothermal temperature was lifted to 210 °C, one hour-treatment was sufficient to completely convert  $\text{H}_2\text{WO}_4$  to  $\text{WO}_3$  (**Fig. S14a**). The phenomenon confirms an accelerated phase conversion with rising temperature. According to **Fig. S14b-d**, the growth of  $\text{WO}_3$  with a thickness of only 13.5 nm within 1 h hydrothermal treatment is negligible compared to its precursor,  $\text{H}_2\text{WO}_4$  with an average thickness of 13.7 nm. This result reveals that the promptly completed phase transformation at high temperature could greatly confine the thickening period of  $\text{WO}_3$ , since the growth of  $\text{WO}_3$  proceeds throughout the hydrothermal reaction.

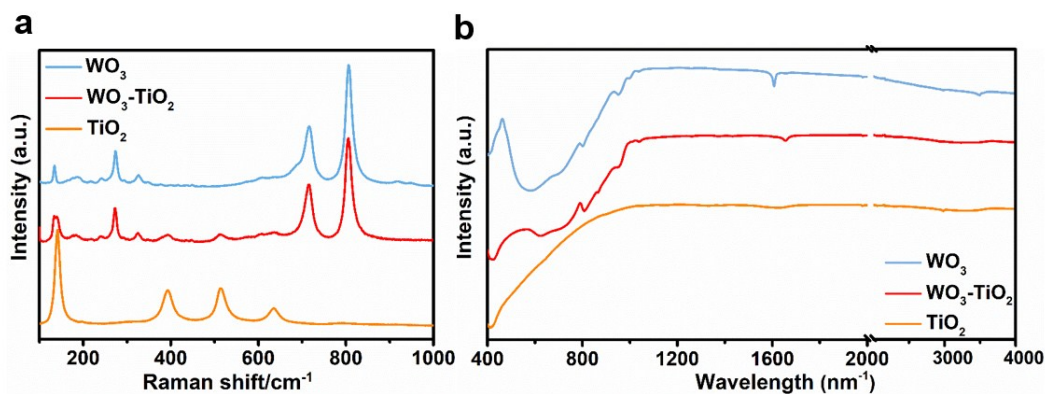

**Fig. S15** (a) Raman and (b) FTIR spectra of pure WO<sub>3</sub>, TiO<sub>2</sub> and the WO<sub>3</sub>-TiO<sub>2</sub> vertical heterojunction.

In **Fig. S15a**, the peaks of TiO<sub>2</sub> at 197.3 cm<sup>-1</sup>, 392.7 cm<sup>-1</sup>, 514.0 cm<sup>-1</sup> and 634.6 cm<sup>-1</sup> show a typical spectrum of anatase structure.<sup>17</sup> Pure WO<sub>3</sub> exhibits the peaks at 134.4 cm<sup>-1</sup> and 271.9 cm<sup>-1</sup> that are assigned to bending vibration of W–O–W bond. Those at higher wave numbers of 716.6 cm<sup>-1</sup> and 809.2 cm<sup>-1</sup> are related to stretching vibration of oxygen in O–W–O.<sup>18</sup> The spectrum from WO<sub>3</sub>-TiO<sub>2</sub> exhibits combined contributions of both TiO<sub>2</sub> and WO<sub>3</sub>, revealing it a hybrid of both phases.

In the FTIR spectrum of **Fig. S15b**, the peak of TiO<sub>2</sub> at 424 cm<sup>-1</sup> is assigned to Ti–O–Ti vibration and for WO<sub>3</sub> the broad peak in the range of 521-696 cm<sup>-1</sup> could be attributed to the characteristic vibration of W–O and W–O–W. The additional peaks of all three samples at around 1600 cm<sup>-1</sup> are due to the adsorbed water and –OH bond. The WO<sub>3</sub>-TiO<sub>2</sub> also exhibits spectral features of both TiO<sub>2</sub> and WO<sub>3</sub>.

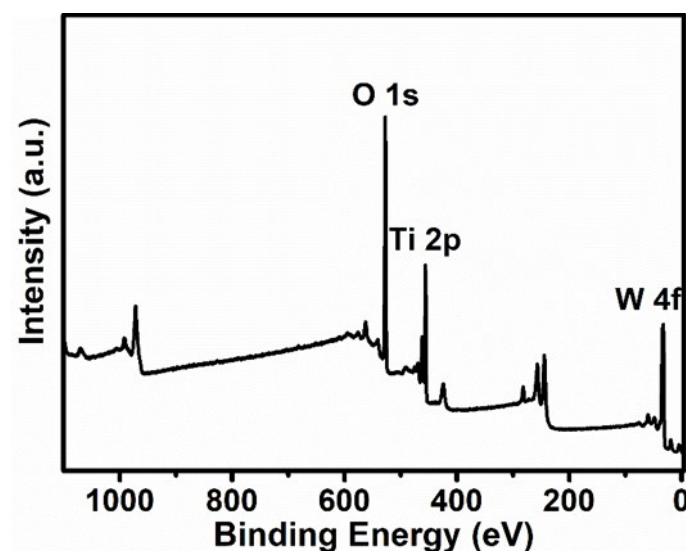

**Fig. S16** Selected, representative XPS survey spectrum of the  $\text{WO}_3\text{-TiO}_2$  heterojunction.

**Table S5** Elemental quantification derived from XPS survey spectra expressed as atomic% of the  $\text{WO}_3\text{-TiO}_2$  heterojunction. The residual fluorine might originate from hydrofluoric acid when the  $\text{TiO}_2$  nanosheets were prepared and the detected C element signal can be attributed to the adsorption of organic contamination, i.e. adventitious carbon.

| Atomic% | Mean $\pm$ deviation |
|---------|----------------------|
| F 1s    | $0.65 \pm 0.08$      |
| O 1s    | $60.29 \pm 0.30$     |
| Ti 2p   | $17.13 \pm 0.37$     |
| C 1s    | $13.06 \pm 0.47$     |
| W 4f    | $8.87 \pm 0.28$      |

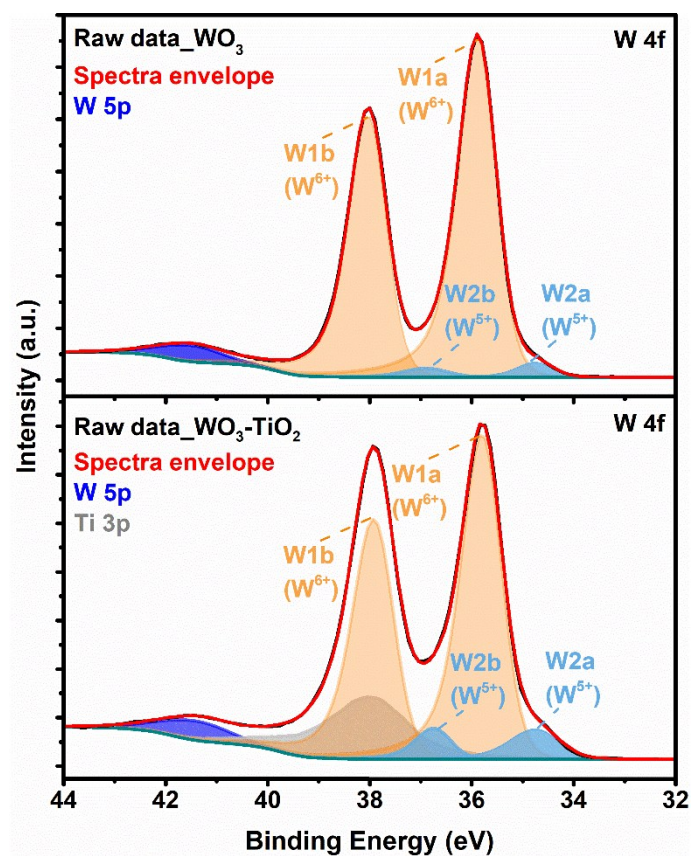

**Fig. S17** High-resolution XPS fitting spectra of W 4f for  $\text{WO}_3$  and the  $\text{WO}_3\text{-TiO}_2$  heterojunction. An increase in W2 peaks (W2a and 2b) assigned to  $\text{W}^{5+}$  could be observed in  $\text{WO}_3\text{-TiO}_2$  spectrum compared to  $\text{WO}_3$  plot.

## Z-scheme photocatalytic charge transportation route.

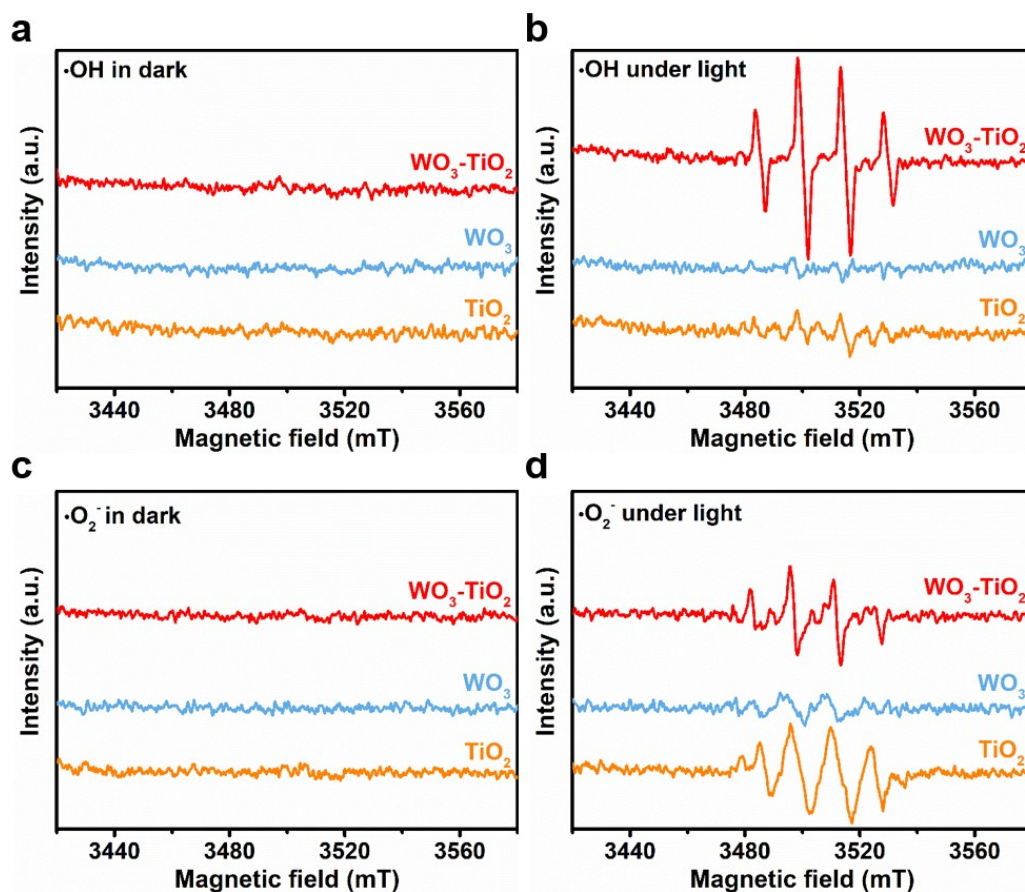

**Fig. S18** EPR spectra of  $\cdot\text{OH}$  generated by  $\text{TiO}_2$ ,  $\text{WO}_3$  and the  $\text{WO}_3\text{-TiO}_2$  heterojunction (a) in dark and (b) under 10 min Xenon lamp irradiation. EPR signals of  $\cdot\text{O}_2^-$  (c) in dark and (d) under 10 min irradiation.

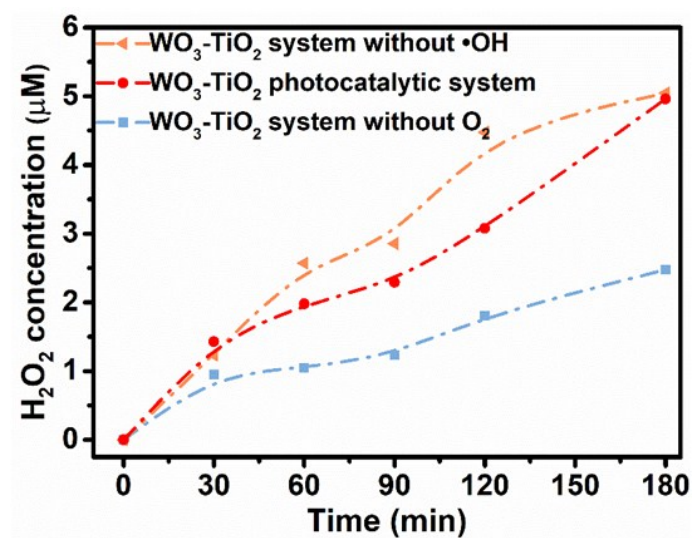

**Fig. S19** The amount of H<sub>2</sub>O<sub>2</sub> in the WO<sub>3</sub>-TiO<sub>2</sub> photocatalytic system with isopropanol as •OH scavenger and N<sub>2</sub> purging to remove O<sub>2</sub>.

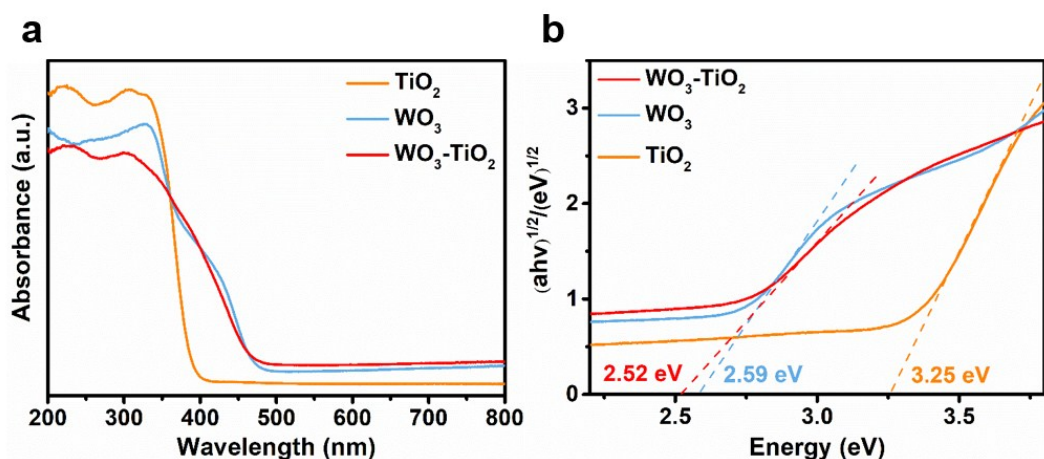

**Fig. S20** (a) UV-vis diffuse reflectance spectra and (b) plots of the  $(\alpha h\nu)^{1/2}$  versus photon energy of the photocatalysts.

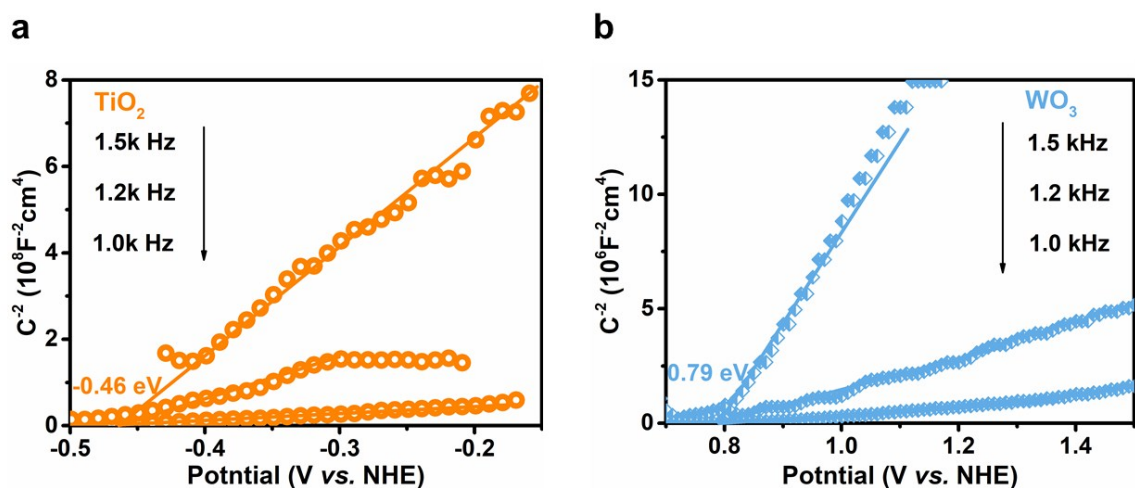

**Fig. S21** Mott-Schottky plots of (a)  $\text{TiO}_2$  and (b)  $\text{WO}_3$ .

The UV-vis diffuse reflectance spectra (DRS) plots in **Fig. S20** shows the light harvesting capacity and bandgaps of photocatalysts. The  $\text{TiO}_2$  exhibits an absorption edge of around 380 nm corresponding to the band gap of 3.25 eV.  $\text{WO}_3$  behaves better in visible light region with the absorption onset at 480 nm and a narrower band gap of 2.59 eV. The heterojunction,  $\text{WO}_3\text{-TiO}_2$  retains the excellent visible light harvesting ability of  $\text{WO}_3$  with a similar band gap value (2.52 eV).

The positive slopes of Mott-Schottky in **Fig. S21** suggest both TiO<sub>2</sub> and WO<sub>3</sub> as n-type semiconductors. The flat band positions of TiO<sub>2</sub> and WO<sub>3</sub> are measured to be -0.46 and +0.79 eV vs. HNE respectively. For n-type semiconductors, the CB edges are close to the values of flat band potentials.<sup>19</sup> The band structures of semiconductors could be analyzed with the following formula (Equation (1)), where  $E_g$  stands for the band gap value,  $E_{VB}$  is the VB potential and  $E_{CB}$  is the CB value.<sup>20, 21</sup> Thus, the CB values of TiO<sub>2</sub> and WO<sub>3</sub> are estimated to be -0.46 eV and +0.79 eV respectively, and the corresponding VB positions are located at +2.79 and +3.38 eV (**Table S6**).

$$E_{VB} = E_g + E_{CB} \quad \text{Equation (1)}$$

**Table S6** Bandgaps and band edge potentials of TiO<sub>2</sub> and WO<sub>3</sub>.

| Semiconductors                 | TiO <sub>2</sub> | WO <sub>3</sub> |
|--------------------------------|------------------|-----------------|
| Bandgap (eV)                   | 3.25             | 2.59            |
| CB edge potential (eV vs. NHE) | -0.46            | +0.79           |
| VB edge potential (eV vs. NHE) | +2.79            | +3.38           |

## Photocatalytic antibacterial performance.

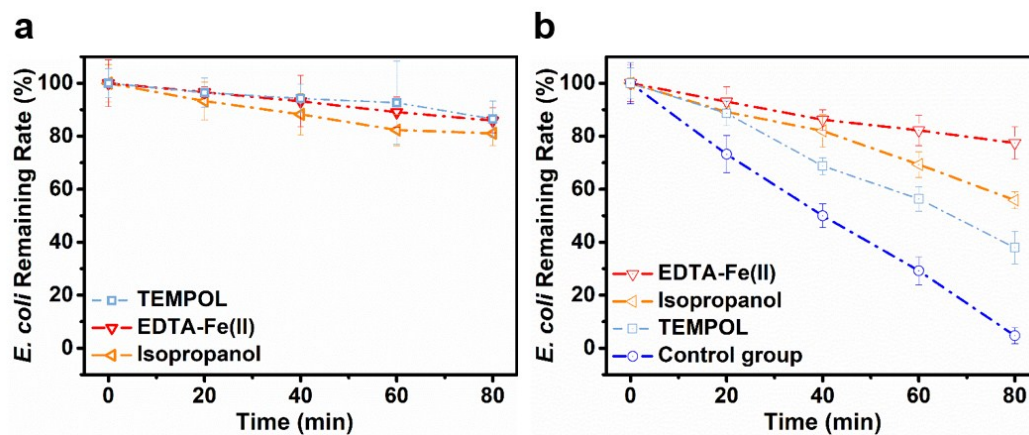

**Fig. S22** *E. coli* survival rate with the existence of scavenger of individual ROS. (a) Control bacterial groups in the scavenger solution under constant illumination. The viable rate of above 80% implies that the used trapping reagents in given dosage have little toxic effect on *E. coli* cells; (b) the photocatalytic reaction system with the presence of both scavengers and  $\text{WO}_3\text{-TiO}_2$ .

## References

1. D. R. Baer and I. S. Gilmore, *J. Vac. Sci. Technol. A* 2018, **36**, 068502.
2. T. L. Barr and S. Seal, *J. Vac. Sci. Technol. A* 1995, **13**, 1239-1246.
3. P. Swift, *Surf. Interface Anal.* 1982, **4**, 47-51.
4. *NIST X-ray Photoelectron Spectroscopy Database, NIST Standard Reference Database Number 20, National Institute of Standards and Technology, Gaithersburg MD, 2000, 20899*, doi: 10.18434/T4T88K, accessed: 2 April 2019.
5. M. C. Biesinger, L. W. M. Lau, A. R. Gerson and R. S. C. Smart, *Appl. Surf. Sci.* 2010, **257**, 887-898.
6. P. M. A. Sherwood, *Surf. Interface Anal.* 2019, **51**, 589-610..
7. C. D. Wagner and G. E. Muilenberg, *Handbook of X-ray Photoelectron Spectroscopy: A Reference Book of Standard Data for Use in X-ray Photoelectron Spectroscopy*, Perkin-Elmer, 1979.
8. G. Beamson and D. Briggs, *High Resolution XPS of Organic Polymers: The Scienta ESCA300 Database*, Wiley, 1992.
9. N. Fairley, *CasaXPS: Processing Software for XPS, AES, SIMS and More*, see [www.casaxps.com](http://www.casaxps.com), accessed: 2 April 2019.
10. M. Biesinger, *X-ray Photoelectron Spectroscopy (XPS) Reference Pages*, see <http://www.xpsfitting.com/>, accessed: 2 April 2019.
11. N. Fairley, C. S. Ltd and C. S. L. Staff, *CasaXPS Manual 2.3.15: Introduction to XPS and AES*, Casa Software, Limited, 2009.
12. S. Tougaard, *Surf. Interface Anal.* 1997, **25**, 137-154.
13. J. Walton, M. R. Alexander, N. Fairley, P. Roach and A. G. Shard, *Surf. Interface Anal.* 2016, **48**, 164-172.
14. C. D. Easton, A. J. Bullock, G. Gigliobianco, S. L. McArthur and S. MacNeil, *J. Mater. Chem. B* 2014, **2**, 5558-5568.
15. J. S. Chen and X. W. Lou, *Mater. Today* 2012, **15**, 246-254.
16. J. Zhang, P. Zhang, T. Wang and J. Gong, *Nano Energy*, 2015, **11**, 189-195.
17. H. Khan and D. Berk, *Appl. Catal. A* 2015, **505**, 285-301.
18. I. M. Szilágyi, B. Fórizs, O. Rosseler, Á. Szegedi, P. Németh, P. Király, G. Tárkányi, B. Vajna, K. Varga-Josepovits, K. László, A. L. Tóth, P. Baranyai and M. Leskelä, *J. Catal.* 2012, **294**, 119-127.

19. Q. Ruan, W. Luo, J. Xie, Y. Wang, X. Liu, Z. Bai, C. J. Carmalt and J. Tang, *Angew. Chem. Int. Ed.* 2017, **56**, 8221-8225.
20. L. J. Zhang, S. Li, B. K. Liu, D. J. Wang and T. F. Xie, *ACS Catal.* 2014, **4**, 3724-3729.
21. S. Cao, B. Shen, T. Tong, J. Fu and J. Yu, *Adv. Funct. Mater.* 2018, **28**, 1800136.
